# Supplementary material for: Construction of coumarin-based cross-linked micelles with pH responsive hydrazone bond and tumor targeting moiety
Source: Royal Society of Chemistry journal article supplement (doi:10.1039/c5tb02729b), 2016-01-01
Supplement: c5tb02729b1.pdf [file c5tb02729b1.pdf]

## Supporting information

### Construction of coumarin-based cross-linked micelles with pH responsive hydrazone bond and tumor targeting moiety

Yu-Bo Long, Wen-Xing Gu, Chengcai Pang, Jianbiao Ma, Hui Gao\*

School of Chemistry and Chemical Engineering, School of Material Science and Engineering, Tianjin Key Laboratory of Organic Solar cells and Photochemical Conversion, Tianjin University of Technology, Tianjin, 300384, China, Email address: ghhigh-er@hotmail.com (H. Gao), Tel: +86-22-60214251

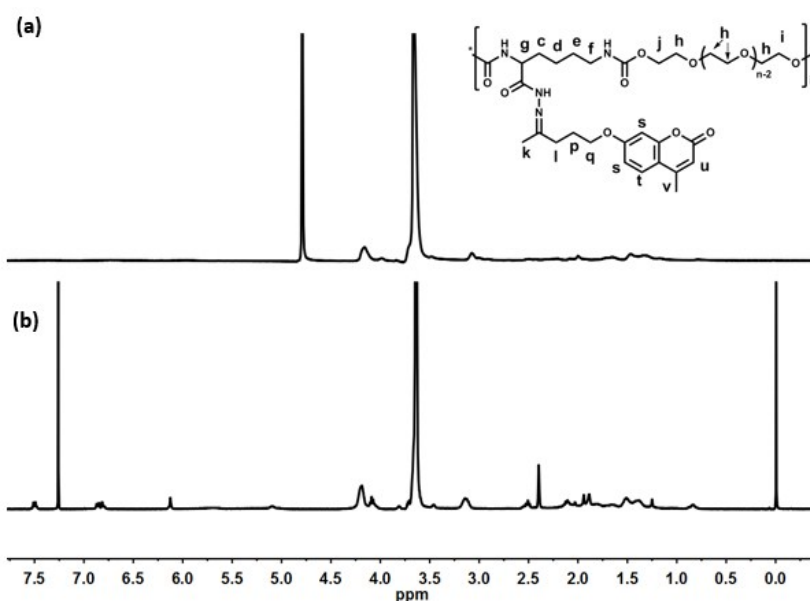

**Figure S1.** <sup>1</sup>H-NMR of micelles in D<sub>2</sub>O (a) and PU-hydra-OMC in CDCl<sub>3</sub> (b).

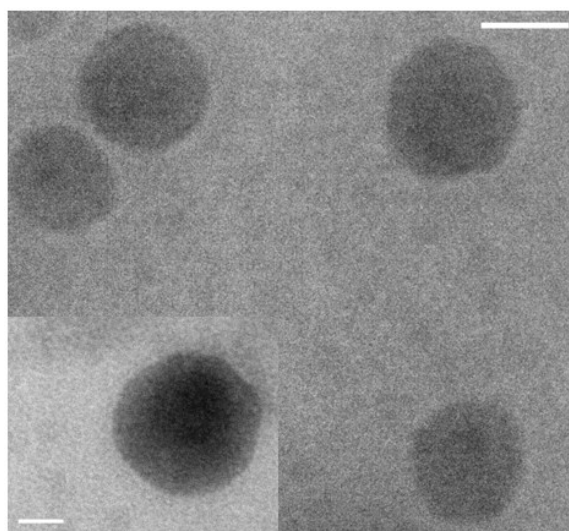

**Figure S2.** TEM microphotography of micelles. (Scale bare: 100 nm for the entire picture and 50 nm for the inside picture).

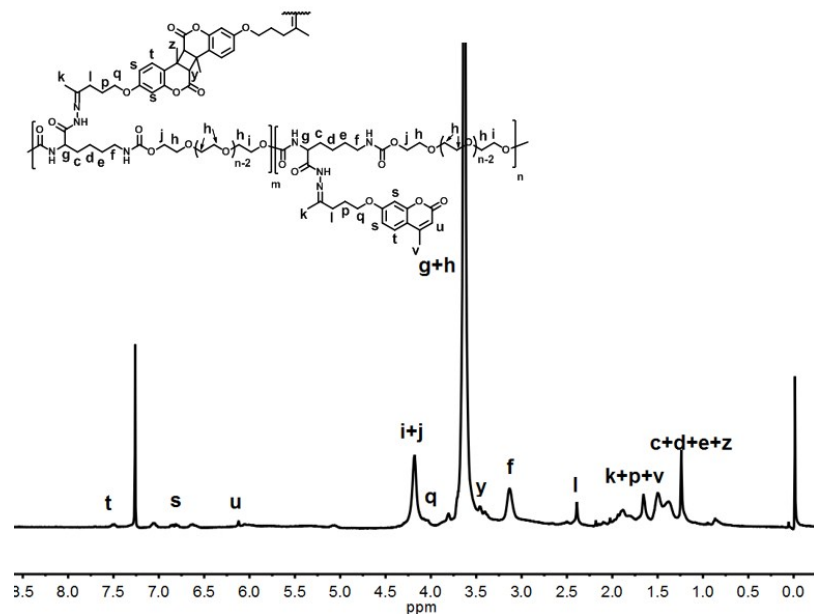

**Figure S3.**  $^1\text{H-NMR}$  of x-micelles in  $\text{CDCl}_3$ .

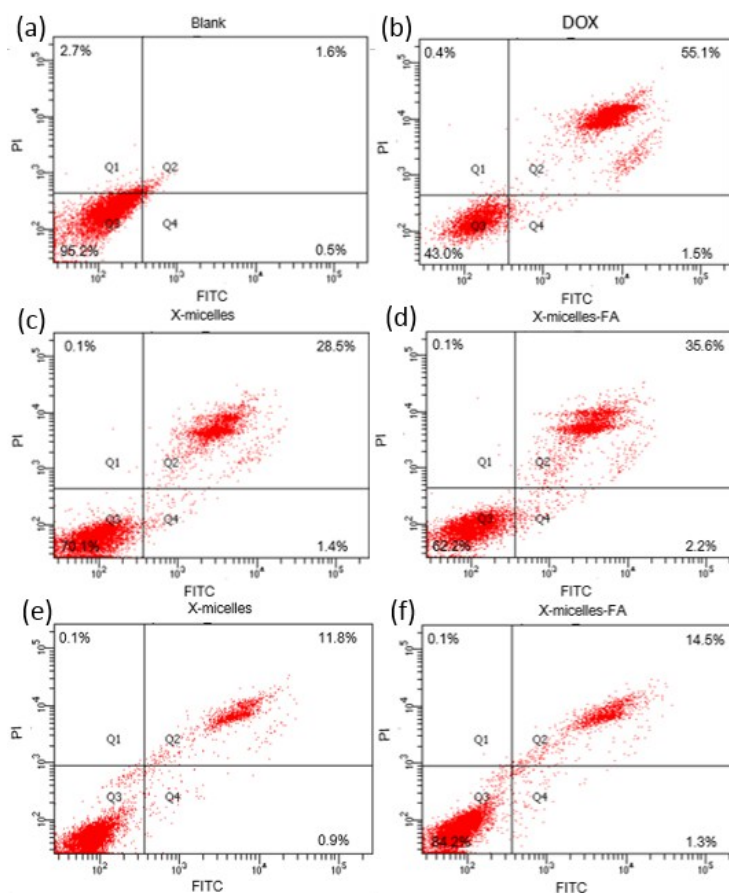

**Figure S4.** The scheme of apoptosis: (a) blank control, (b) DOX, (c) x-micelles (d) x-micelles-FA for HeLa cells, and (e) x-micelles, (f) x-micelles-FA for L929 cells. Images were taken from one out of three measurements in a typical experiment. The dosage of DOX for both HeLa and L929 cells was  $2\text{ }\mu\text{g/mL}$ .
